# Supplementary material for: Spanish version of the screening Örebro Musculoskeletal Pain Questionnaire: a cross-cultural adaptation and validation
Source: Health Qual Life Outcomes. 2014 Oct 29;12:157. doi: 10.1186/s12955-014-0157-5 (PMC4219048; doi:10.1186/s12955-014-0157-5)
Supplement: Additional file 1: — Örebro Musculoskeletal Pain Questionnaire Spanish Version. [file 12955_2014_157_MOESM1_ESM.pdf]

**Additional file 1**

**ÖREBRO MUSCULOSKELETAL PAIN QUESTIONNAIRE**

Spanish Version

**1. Nombre:**

**Teléfono:**

**Fecha:**

**2. Fecha de la lesión:**

**Fecha de nacimiento:**

**3. Sexo:**

**4. Dónde nació:**

Estas preguntas y afirmaciones son aplicables si tiene molestias o dolores como en el cuello, la espalda, el hombro.

Por favor lea y responda las preguntas cuidadosamente. No tome demasiado tiempo para responder a las preguntas, sin embargo, es importante que las conteste todas. Siempre encontrará una respuesta para su situación particular.

**5. ¿Dónde le duele? Marque la(s) casilla(s) correspondiente(s)**

- ☐ Cuello      ☐ Hombro      ☐ Brazo      ☐ Parte alta de la espalda  
☐ Parte Baja      ☐ Pierna      ☐ Otro (Indicar): \_\_\_\_\_

2 x (Max 10)

**6. ¿Cuántos días de trabajo ha perdido a causa del dolor durante los últimos 18 meses? Marque sólo una.**

- ☐ 0 Días (1)      ☐ 1 - 2 Días (2)      ☐ 3 - 7 Días (3)      ☐ 8 - 14 Días (4)  
☐ 15 - 30 Días (5)      ☐ 1 Mes (6)      ☐ 2 Mes (7)  
☐ 3 - 6 Meses (8)      ☐ 6 - 12 Meses (9)      ☐ Más de un año (10)

**7. ¿Desde hace cuanto tiempo sufre su dolor actual? Marque sólo una.**

- ☐ 0 Días (1)      ☐ 1 - 2 Días (2)      ☐ 3 - 7 Días (3)      ☐ 8 - 14 Días (4)  
☐ 15 - 30 Días (5)      ☐ 1 Mes (6)      ☐ 2 Mes (7)  
☐ 3 - 6 Meses (8)      ☐ 6 - 12 Meses (9)      ☐ Más de un año (10)

**8. ¿Es su trabajo pesado o monótono? Marque la mejor opción.**

0      1      2      3      4      5      6      7      8      9      10

No en absoluto

Extremadamente

9. ¿Cómo calificaría usted el dolor que tuvo durante la semana pasada? Marque uno.

0 1 2 3 4 5 6 7 8 9 10

No dolor

Peor dolor soportable.

10. En los últimos tres meses, de media, ¿Cómo de malo fue su dolor en una escala de 0 – 10? Marque uno.

0 1 2 3 4 5 6 7 8 9 10

No dolor

Peor dolor soportable.

11. ¿Con qué frecuencia diría usted que ha experimentado episodios de dolor, de media, durante los últimos tres meses? Marque uno

0 1 2 3 4 5 6 7 8 9 10

Nunca

Siempre.

12. Sobre la base de todas las cosas para hacer frente, o lidiar con su dolor, durante un día normal ¿Cuánto es capaz de disminuirlo? Marque uno.

0 1 2 3 4 5 6 7 8 9 10

No consigo disminuirlo

Consigo eliminarlo por completo

13. ¿Cómo de tenso(a) o ansioso(a) se ha sentido durante la última semana? Marque uno.

Absolutamente calmado y relajado

Tenso y nervioso como nunca

14. ¿Cuánto se ha sentido molesto(a), por una sensación depresiva, durante la última semana? Marque uno.

0 1 2 3 4 5 6 7 8 9 10

Nunca

Extremadamente

15. En su opinión, ¿Cómo de grande es el riesgo de que su dolor actual puede llegar a ser persistente? Marque uno

16. En su opinión, ¿Cuáles son las probabilidades de que usted será capaz de trabajar en seis meses?

Ningún riesgo

Riesgo muy alto

0 1 2 3 4 5 6 7 8 9 10

Ninguna probabilidad

Muchas posibilidades

**17. Considerando sus rutinas de trabajo, gestión, salario, posibilidades de promoción y compañeros de trabajo, ¿Cual es su grado de satisfacción con su trabajo?**

10 - x

0 1 2 3 4 5 6 7 8 9 10

Absolutamente insatisfecho

Completamente satisfecho

Éstos son algunas de las cosas que otras personas nos han dicho acerca de su dolor. Para cada afirmacion, marque un número de 0 a 10 para decir cuánto afectaría a su dolor las actividades físicas, tales como agacharse, levantar objetos, caminar o conducir.

**18. La actividad física hace que mi dolor empeore.**

0 1 2 3 4 5 6 7 8 9 10

Completamente en desacuerdo

Completamente de acuerdo

**19. Un aumento del dolor es una indicación de que debo dejar lo que estoy haciendo hasta que disminuye o desaparece.**

0 1 2 3 4 5 6 7 8 9 10

Completamente en desacuerdo

Completamente de acuerdo

**20. No debería realizar mi trabajo habitual con mi dolor actual.**

0 1 2 3 4 5 6 7 8 9 10

Completamente en desacuerdo

Completamente de acuerdo

Le indicamos una lista con cinco actividades. Marque el número que mejor describe su capacidad actual de participar en cada una de estas actividades.

**21. Puedo realizar una actividad ligera durante una hora.**

10 - x

0 1 2 3 4 5 6 7 8 9 10

No puedo hacerlo debido a mi Dolor

El dolor no es un problema

---

**22. Puedo caminar durante una hora.**

0      1      2      3      4      5      6      7      8      9      10

No puedo hacerlo debido a mi Dolor      El dolor no es un problema

10 - x

---

**23. Puedo hacer las tareas domésticas.**

0      1      2      3      4      5      6      7      8      9      10

No puedo hacerlo debido a mi Dolor      El dolor no es un problema

10 - x

---

**24. Puedo hacer la compra semanal.**

0      1      2      3      4      5      6      7      8      9      10

No puedo hacerlo debido a mi Dolor      El dolor no es un problema

10 - x

---

**25. Puedo dormir por la noche.**

0      1      2      3      4      5      6      7      8      9      10

No puedo hacerlo debido a mi Dolor      El dolor no es un problema

10 - x
